# Supplementary material for: Transparent conducting oxide top contacts for organic electronics
Source: Royal Society of Chemistry journal article supplement (doi:10.1039/c3tc31296h), 2013-10-22

## SUPPLEMENTAL INFORMATION

Figure S1 Variation in the measured sheet resistance of AZO films prepared with increasing target  $\text{Al}_2\text{O}_3$  content (all at 150 °C, 50 mTorr).

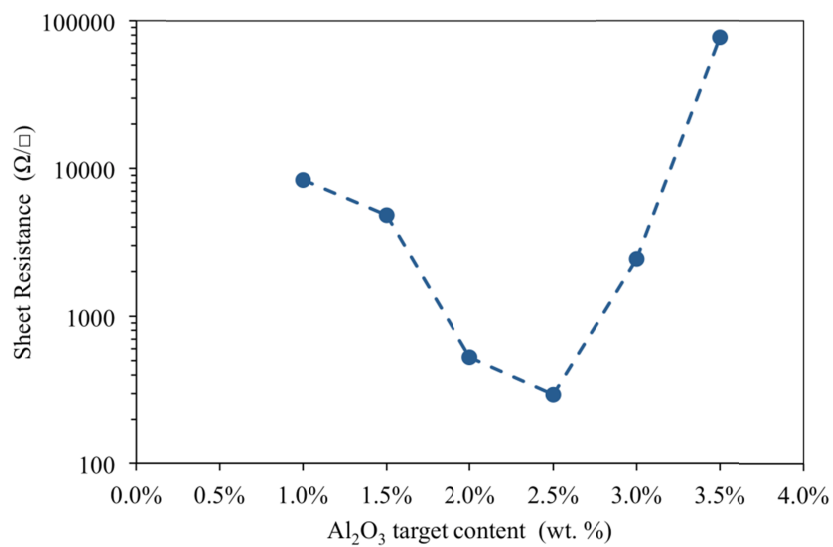

Figure S2 - Current density-voltage (J-V) plot for a conventional Al top contact organic solar cell ITO/PEDOT:PSS/P3HT/PCBM/Al with measured device parameters.

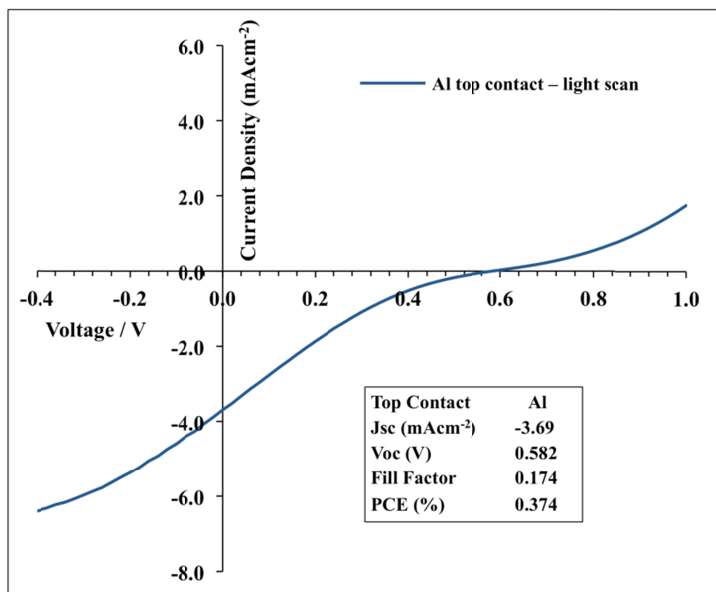

Supplement: c3tc31296h.pdf [file c3tc31296h.pdf]
